# Supplementary material
Source: publisher site journal article supplement (https://www.dovepress.com/article/297581)
Supplement: Supplementary file 1 [file get_supplementary_file.php]

**Supplementary material 2. Focus group topic guide**

| **Welcome and presentation of objectives (5’)** | |
| --- | --- |
| **Icebreaker and presentations (10’)** | |
| **Presentation and discussion interview findings (20’)** | |
| **Co-working session**  **(15’ read drafted educational material**  **45’ discussion)** | *What are your thoughts on the material?*   - *Content* - *Comprehension* - *Presentation* - *Utility*   *How could the material be improved?*  *What could be important to keep as it is?*  *What is your general opinion on the material?*  *Do you think this material could be used to give information on acute lower respiratory infections (ALRTIs)?*  *Do you think the material provides enough information?*  *Do you think the most important information can be easily found in the material?*  *Do you think the language used is easy to understand?*  *Is there a logical order in how the information is presented?*  *What do you think of the images used?* |
| **Conclusions and closing**  **(10’)** | *Brief summary of key points discussed*  *Ask if they want to add anything else*  *Thank participants*  *Remind the use of the findings and ethical considerations* |
